# Supplementary material for: Methylviologen-pendant iron porphyrins as models of a reduction enzyme: six-electron reduction of nitrobenzene to anilineElectronic supplementary information (ESI) available: time-courses of reduction, UV-VIS spectral changes, cyclic voltammograms, EPR spectra, conversion and yield percentages for the reduction of p-nitroanisole. See http://www.rsc.org/suppdata/dt/b2/b211125j/
Source: Royal Society of Chemistry journal article supplement (doi:10.1039/b211125j), 2003-02-10
Supplement: b211125j.pdf [file b211125j.pdf]

### Electronic supplementary information (ESI)

Synthesis of methylviologen-pendent iron porphyrins as functional model of reduction enzyme and its application to six-electron reduction of nitrobenzene to aniline

Hiroaki Koga, Taisuke Hamada, and Shigeyoshi Sakaki\*

#### Supporting Information

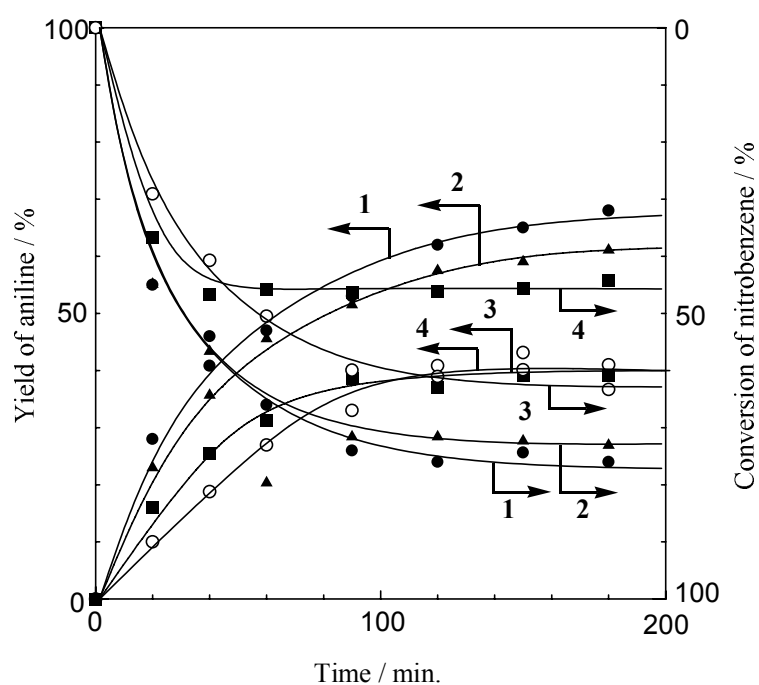

**Figure S1.** Time-courses of reduction of nitrobenzene catalyzed by *m*-MV-FeCl(TPP) **1**, *p*-MV-FeCl(TPP) **2**, FeCl(TPP) with MV<sup>2+</sup> **3**, and FeCl(TPP) **4** in diglyme/MeOH, at 25°C. [Iron porphyrin] = [MV<sup>2+</sup>] = 3.75×10<sup>-2</sup> mmol dm<sup>-3</sup>. Iron porphyrin/nitrobenzene/NaBH<sub>4</sub> = 1/400/400 in mole ratio.

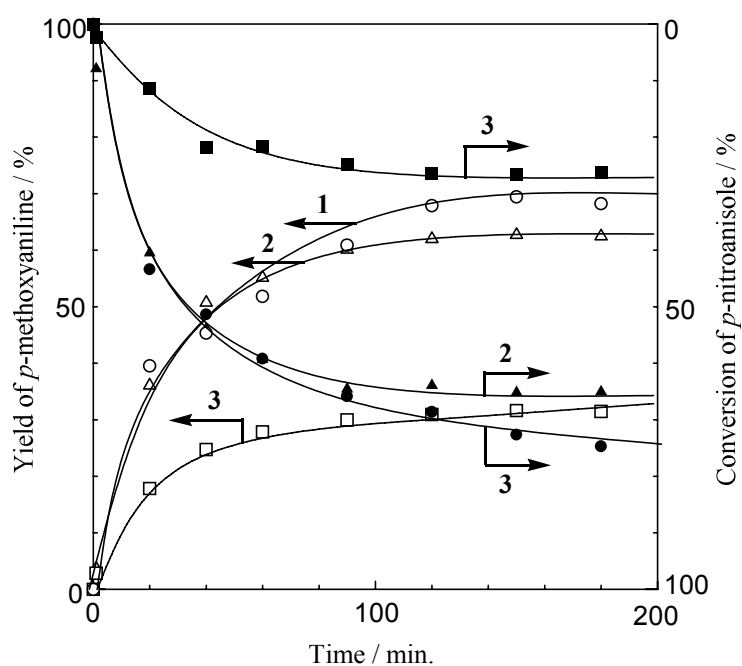

**Figure S2.** Time-courses of reduction of *p*-nitroanisole catalyzed by *m*-MV-FeCl(TPP) **1**, *p*-MV-FeCl(TPP) **2**, and FeCl(TPP) **3** in diglyme/MeOH, at 25°C. [Iron porphyrin] =  $3.75 \times 10^{-2}$  mmol dm<sup>-3</sup>. Iron porphyrin/*p*-nitroanisole/NaBH<sub>4</sub> = 1/400/400 in mole ratio.

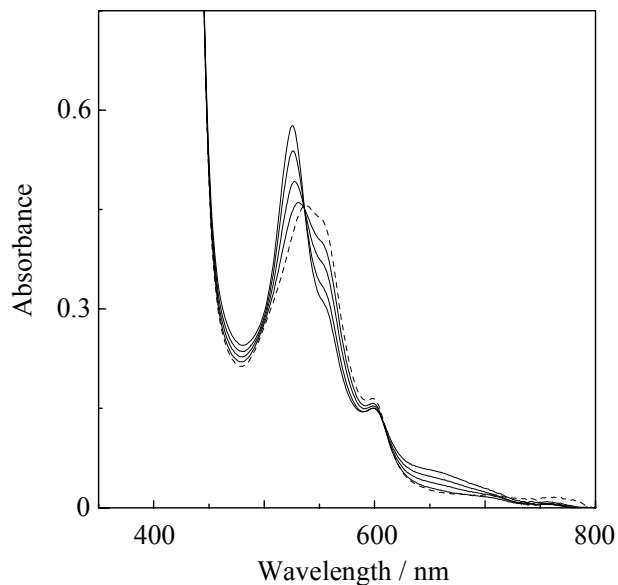

**Figure S3.** UV-VIS spectral changes of FeCl(TPP) by addition of aniline in the presence of NaBH<sub>4</sub>.

In diglyme/MeOH (1/1 v/v) at 25°C. [FeCl(TPP)] =  $3.75 \times 10^{-2}$  mmol dm<sup>-3</sup>. FeCl(TPP)/NaBH<sub>4</sub>/aniline = 1/400/400 in mole ratio. Broken line represents the spectra of *p*-MV-FeCl(TPP) in the presence of NaBH<sub>4</sub>. Solid lines represent spectra of *p*-MV-FeCl(TPP) in the addition of aniline.

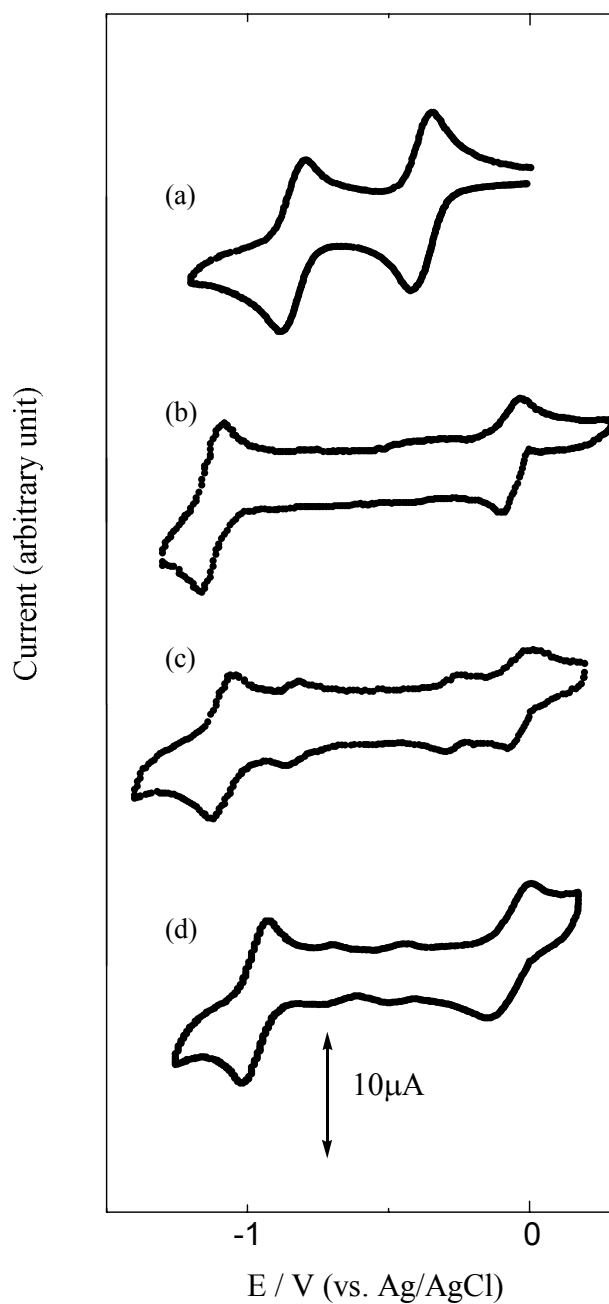

**Figure S4.** Cyclic voltammograms of methylviologen (a), FeCl(TPP) (b), *p*-MV-FeCl(TPP) (c), and *m*-MV-FeCl(TPP) (d) in diglyme/MeOH. Supporting electrolyte is *n*-Bu<sub>4</sub>NPF<sub>6</sub> (0.1 mol dm<sup>-3</sup>). Scan rate is 50 mV s<sup>-1</sup>.

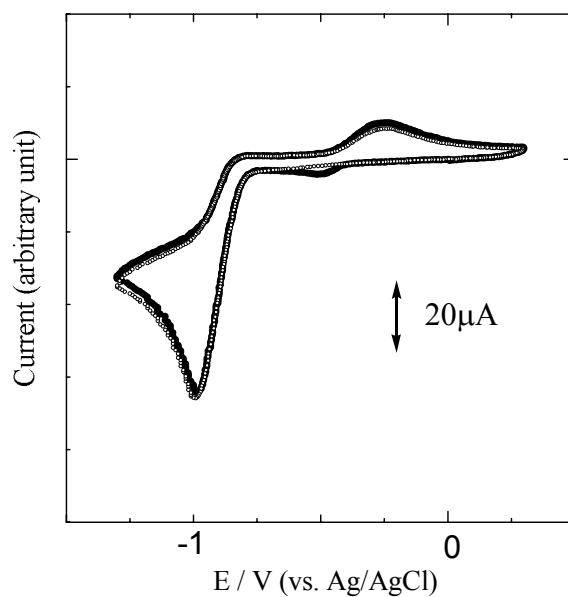

**Figure S5.** Cyclic voltammogram of nitrobenzene in diglyme/MeOH. Open-circle represents first scan and closed-circle represents continuous scan. Supporting electrolyte is  $n\text{-Bu}_4\text{NPF}_6$  ( $0.1 \text{ mol dm}^{-3}$ ). Scan rate is  $50 \text{ mV s}^{-1}$ .

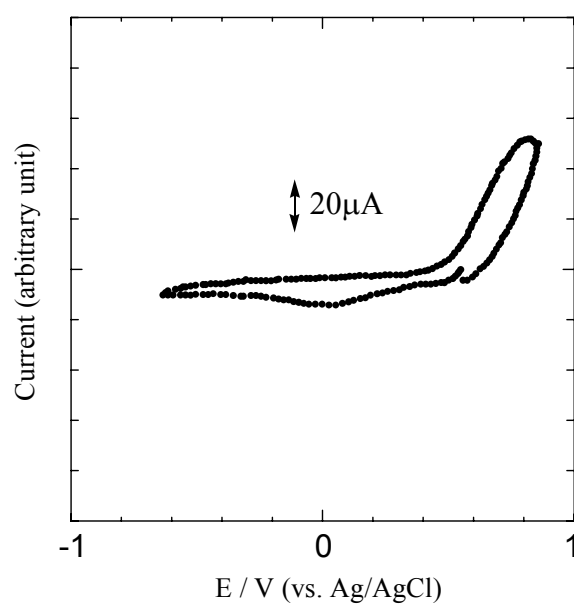

**Figure S6.** Cyclic voltammogram of phenylhydroxylamine in diglyme/MeOH. Supporting electrolyte is  $n\text{-Bu}_4\text{NPF}_6$  ( $0.1 \text{ mol dm}^{-3}$ ). Scan rate is  $50 \text{ mV s}^{-1}$ .

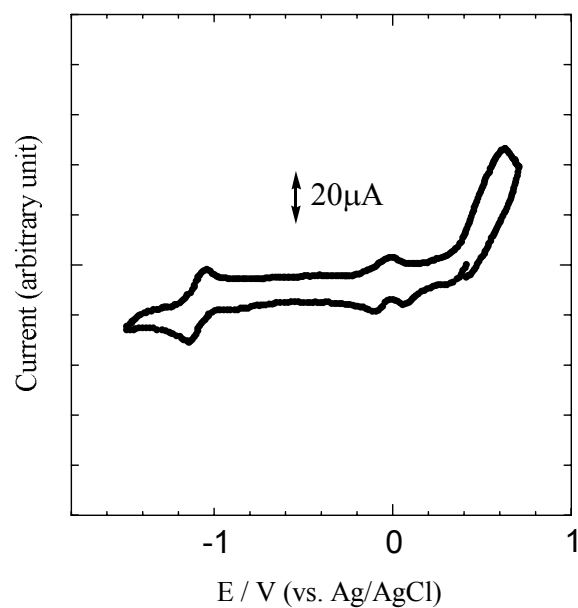

**Figure S7.** Cyclic voltammograms of mixtures of FeCl(TPP) with phenylhydroxylamine in diglyme/MeOH. Supporting electrolyte is *n*-BuNPF<sub>6</sub> (0.1 mol dm<sup>-3</sup>). Scan rate is 50mV s<sup>-1</sup>.

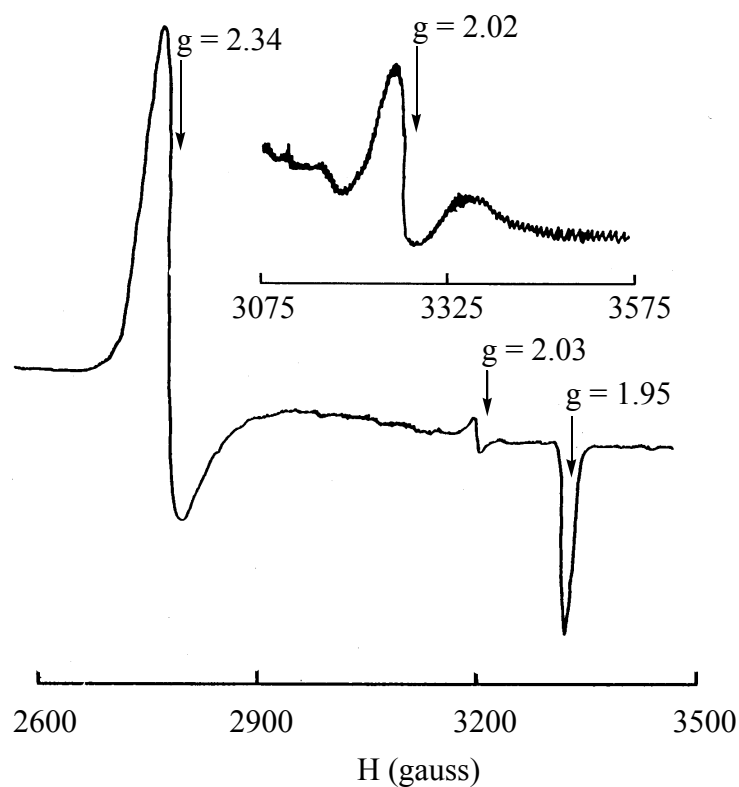

**Figure S8.** EPR spectra of *p*-MV-FeCl(TPP) with NaBH<sub>4</sub> in THF/MeOH at 77K. Inset is *p*-MV-FeCl(TPP) with NaBH<sub>4</sub> in diglyme/methanol.

**Table S1.** Reduction of *p*-nitroanisole catalyzed by FeCl(TPP) and *p*-MV-FeCl(TPP) with NaBH<sub>4</sub> in the presence of dioxygen molecule.

| Oxygen  | FeCl(TPP)                   |                        | [ <i>p</i> -MV-FeCl(TPP)]   |                        |
|---------|-----------------------------|------------------------|-----------------------------|------------------------|
|         | Conversion (%) <sup>b</sup> | Yield (%) <sup>b</sup> | Conversion (%) <sup>b</sup> | Yield (%) <sup>b</sup> |
| 10 eq.  | 54                          | 50                     | 97                          | 94                     |
| 50 eq.  | 56                          | 45                     | 76                          | 58                     |
| 100 eq. | 24                          | 10                     | 56                          | 45                     |

<sup>a</sup>[Iron porphyrin] = 3.75×10<sup>-2</sup> mmol dm<sup>-3</sup>, [cat.]/NaBH<sub>4</sub>/substrate = 1/1200/ 400, 3h at 15°C. <sup>b</sup>Based on *p*-nitroanisole.
